# Supplementary material for: In Silico Identification and Experimental Validation of Insertion–Deletion Polymorphisms in Tomato Genome
Source: PubMed Central journal article supplement (PMC4131836; doi:10.1093/dnares/dsu008), 2014-03-11
Supplement: supp_dsu008_dsu008supp_fig2.pdf [file supp_dsu008_dsu008supp_fig2.pdf]

*Solanum pimpinellifolium*    *S. lycopersicum* var. *cerasiforme*    *S. lycopersicum*

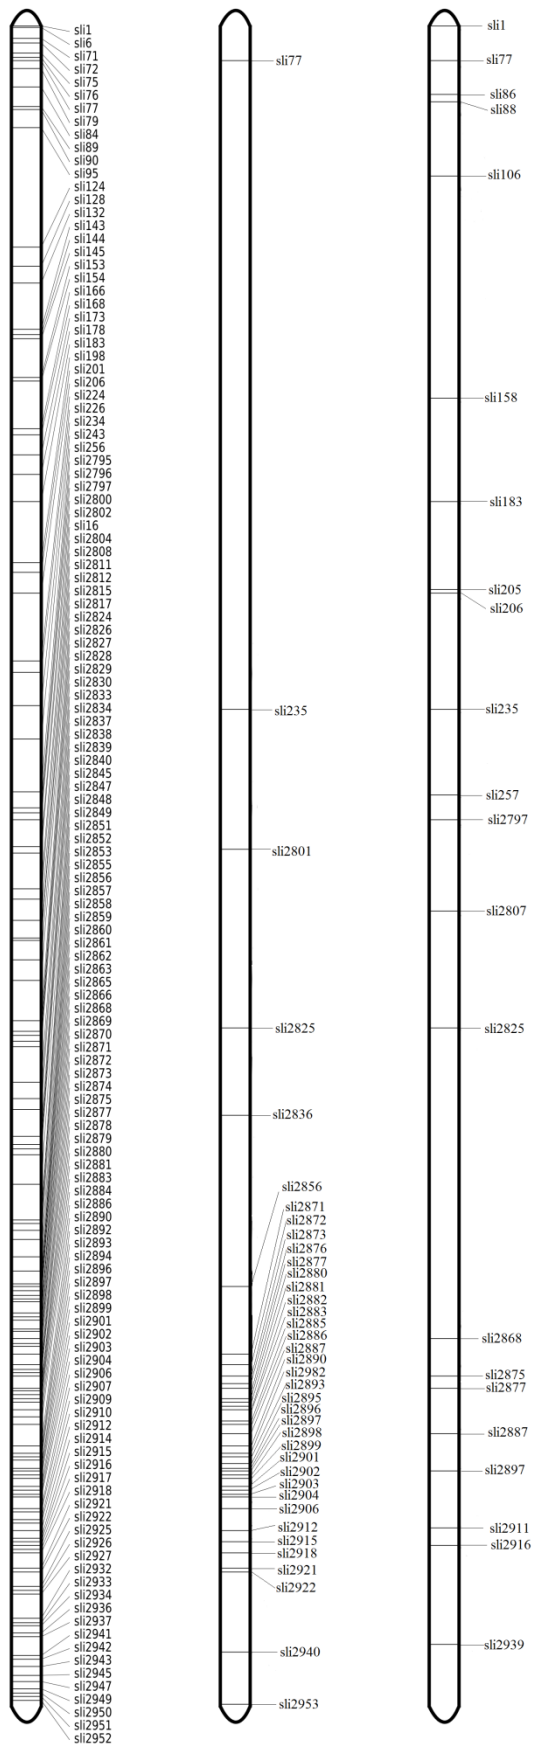

chr01

*Solanum pimpinellifolium*

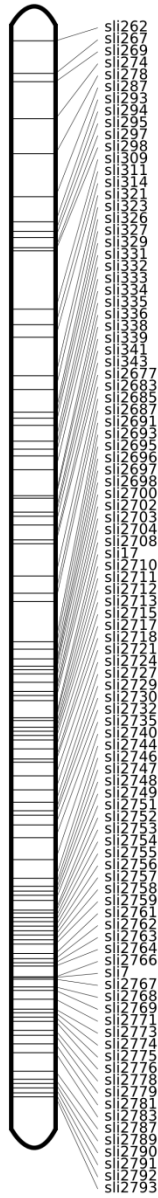

*S. lycopersicum* var. *cerasiforme*

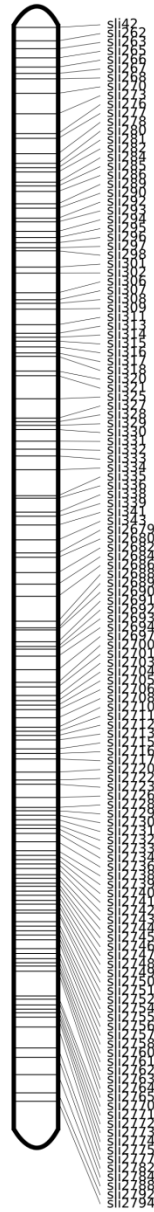

chr02

*S. lycopersicum*

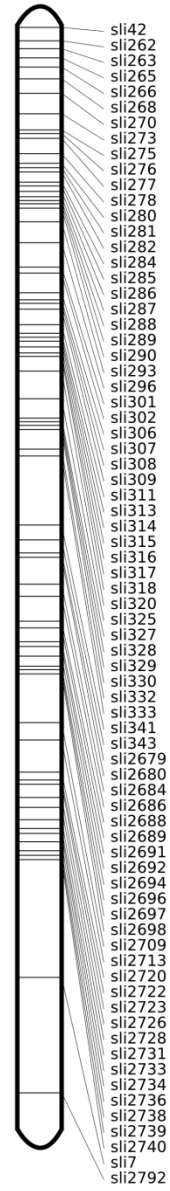

*Solanum pimpinellifolium*

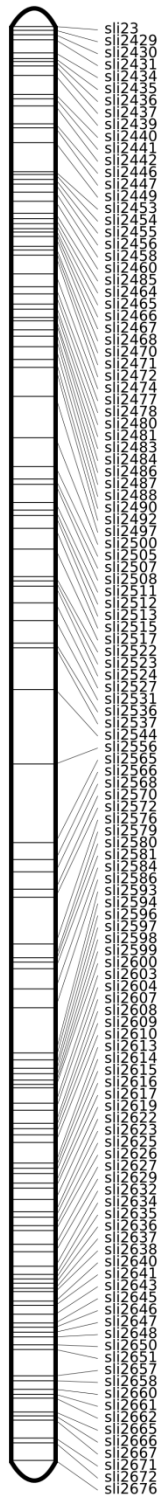

*S. lycopersicum* var. *cerasiforme*

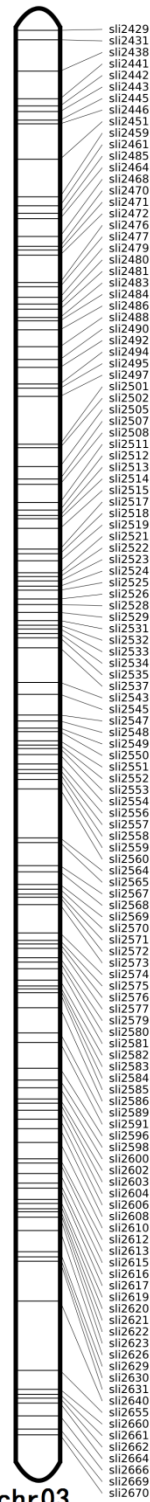

chr03

*S. lycopersicum*

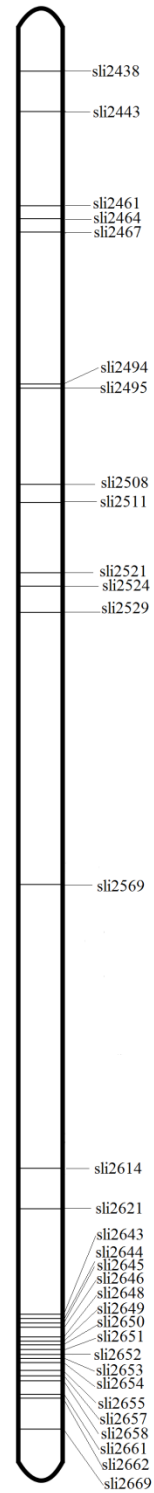

Diagram illustrating a vertical structure with 44 segments, numbered 1 through 44, arranged in a column. The segments are connected to a horizontal line on the right side of the structure. The segments are arranged in a vertical column, with the top segment being the widest and the bottom segment being the narrowest. The horizontal lines on the right side of the oval are of varying lengths, corresponding to the width of each segment. The entire structure is enclosed in a vertical oval frame.

[illegible]

11214  
 11218A  
 11215  
 11216  
 11219  
 11220  
 11221  
 11222  
 11230  
 11231  
 11232  
 11233  
 11234  
 11235  
 11236  
 11237  
 11238  
 11239  
 11240  
 11241  
 113003  
 113005  
 113006  
 113007  
 113008  
 113009  
 113010  
 113011  
 113012  
 113013  
 113014  
 113015  
 113016  
 113017  
 113018  
 113019  
 113020  
 113021  
 113022  
 113023  
 113024  
 113025  
 113026  
 113027  
 113028  
 113029  
 113030  
 113031  
 113032  
 113033  
 113034  
 113035  
 113036  
 113037  
 113038  
 113039  
 113040  
 113041  
 113042  
 113043  
 113044  
 113045  
 113046  
 113047  
 113048  
 113049  
 113050  
 113051  
 113052  
 113053  
 113054  
 113055  
 113056  
 113057  
 113058  
 113059  
 113060  
 113061  
 113062  
 113063  
 113064  
 113065  
 113066  
 113067  
 113068  
 113069  
 113070  
 113071  
 113072  
 113073  
 113074  
 113075  
 113076  
 113077  
 113078  
 113079  
 113080  
 113081  
 113082  
 113083  
 113084  
 113085  
 113086  
 113087  
 113088  
 113089  
 113090  
 113091  
 113092  
 113093  
 113094  
 113095  
 113096  
 113097  
 113098  
 113099  
 113100  
 113101  
 113102  
 113103  
 113104  
 113105  
 113106  
 113107  
 113108  
 113109  
 113110  
 113111  
 113112  
 113113  
 113114  
 113115  
 113116  
 113117  
 113118  
 113119  
 113120  
 113121  
 113122  
 113123  
 113124  
 113125  
 113126  
 113127  
 113128  
 113129  
 113130  
 113131  
 113132  
 113133  
 113134  
 113135  
 113136  
 113137  
 113138  
 113139  
 113140  
 113141  
 113142  
 113143  
 113144  
 113145  
 113146  
 113147  
 113148  
 113149  
 113150  
 113151  
 113152  
 113153  
 113154  
 113155  
 113156  
 113157  
 113158  
 113159  
 113160  
 113161  
 113162  
 113163  
 113164  
 113165  
 113166  
 113167  
 113168  
 113169  
 113170  
 113171  
 113172  
 113173  
 113174  
 113175  
 113176  
 113177  
 113178  
 113179  
 113180  
 113181  
 113182  
 113183  
 113184  
 113185  
 113186  
 113187  
 113188  
 113189  
 113190  
 113191  
 113192  
 113193  
 113194  
 113195  
 113196  
 113197  
 113198  
 113199  
 113200  
 113201  
 113202  
 113203  
 113204  
 113205  
 113206  
 113207  
 113208  
 113209  
 113210  
 113211  
 113212  
 113213  
 113214  
 113215  
 113216  
 113217  
 113218  
 113219  
 113220  
 113221  
 113222  
 113223  
 113224  
 113225  
 113226  
 113227  
 113228  
 113229  
 113230  
 113231  
 113232  
 113233  
 113234  
 113235  
 113236  
 113237  
 113238  
 113239  
 113240  
 113241  
 113242  
 113243  
 113244  
 113245  
 113246  
 113247  
 113248  
 113249  
 113250  
 113251  
 113252  
 113253  
 113254  
 113255  
 113256  
 113257  
 113258  
 113259  
 113260  
 113261  
 113262  
 113263  
 113264  
 113265  
 113266  
 113267  
 113268  
 113269  
 113270  
 113271  
 113272  
 113273  
 113274  
 113275  
 113276  
 113277  
 113278  
 113279  
 113280  
 113281  
 113282  
 113283  
 113284  
 113285  
 113286  
 113287  
 113288  
 113289  
 113290  
 113291  
 113292  
 113293  
 113294  
 113295  
 113296  
 113297  
 113298  
 113299  
 113300  
 113301  
 113302  
 113303  
 113304  
 113305  
 113306  
 113307  
 113308  
 113309  
 113310  
 113311  
 113312  
 113313  
 113314  
 113315  
 113316  
 113317  
 113318  
 113319  
 113320  
 113321  
 113322  
 113323  
 113324  
 113325  
 113326  
 113327  
 113328  
 113329  
 113330  
 113331  
 113332  
 113333  
 113334  
 113335  
 113336  
 113337  
 113338  
 113339  
 113340  
 113341  
 113342  
 113

*Solanum pimpinellifolium*   *S. lycopersicum* var. *cerasiforme*   *S. lycopersicum*

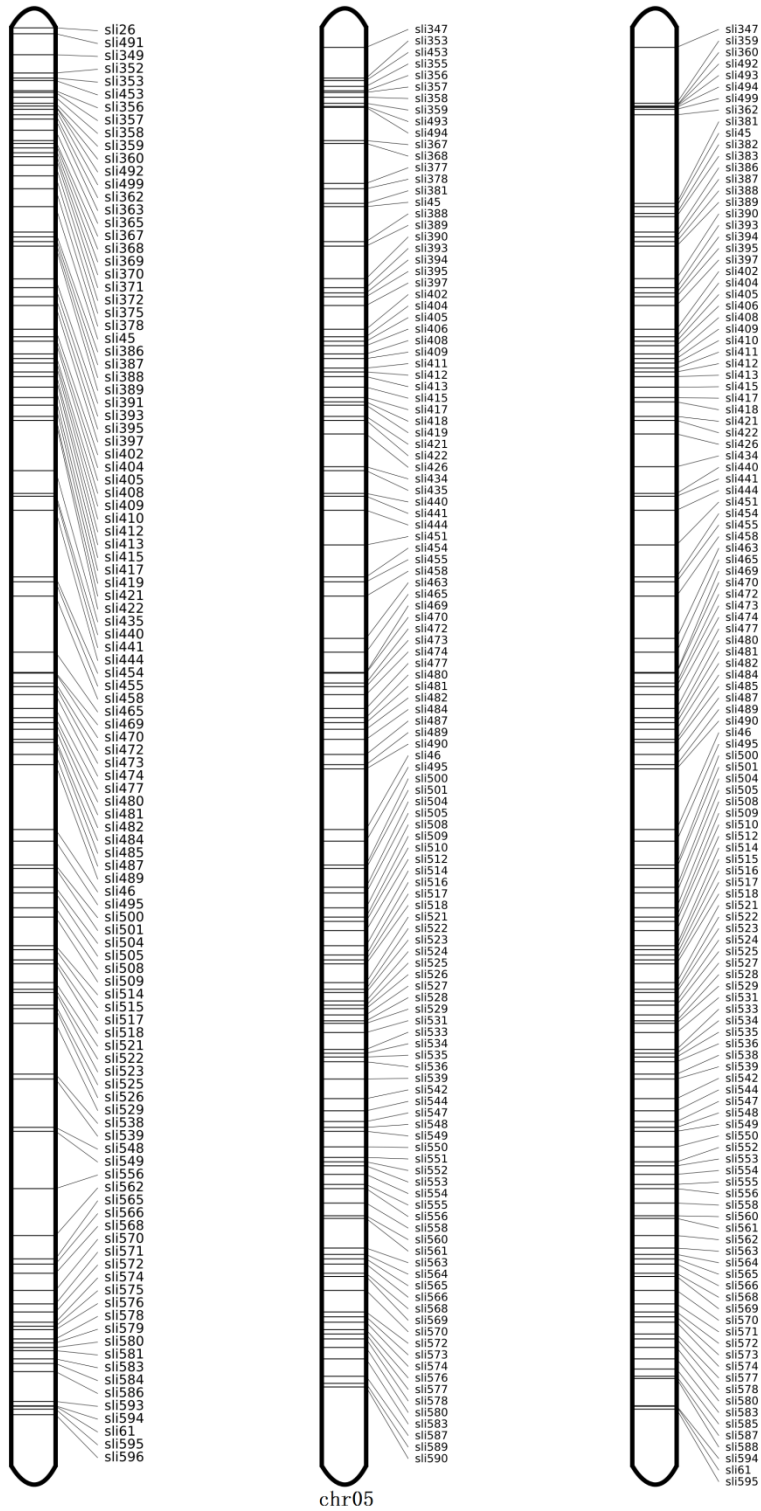

*Solanum pimpinellifolium* *S. lycopersicum* var. *cerasiforme* *S. lycopersicum*

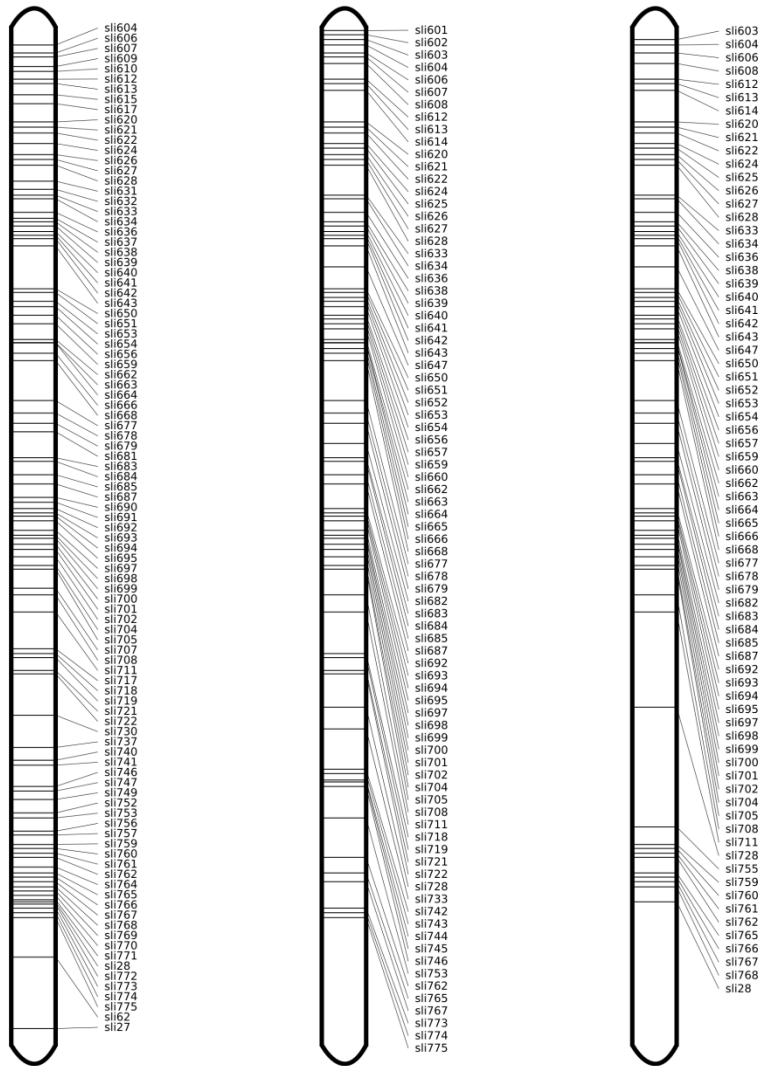

chr06

*Solanum pimpinellifolium*   *S. lycopersicum* var. *cerasiforme*   *S. lycopersicum*

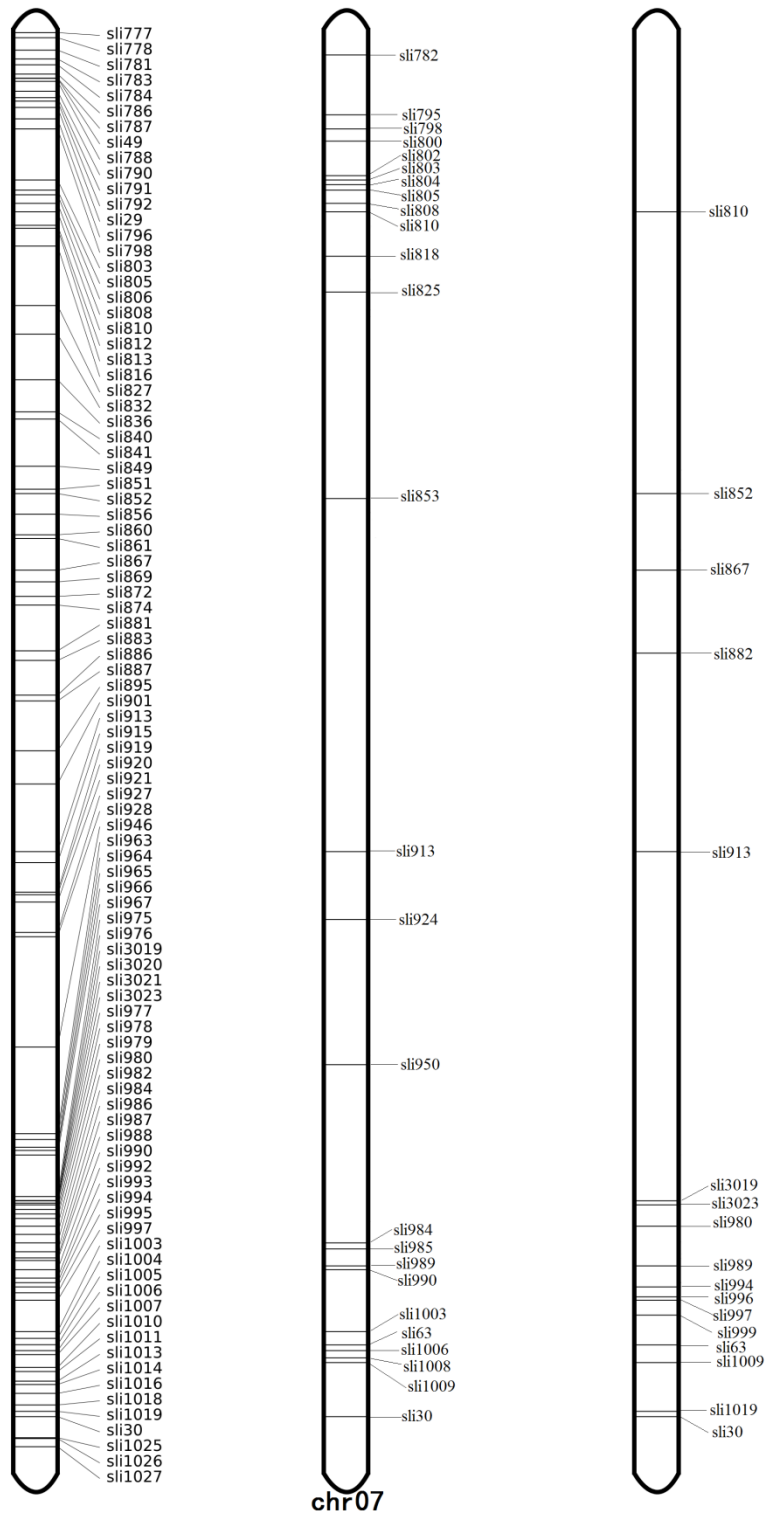



*Solanum pimpinellifolium*   *S. lycopersicum* var. *cerasiforme*   *S. lycopersicum*

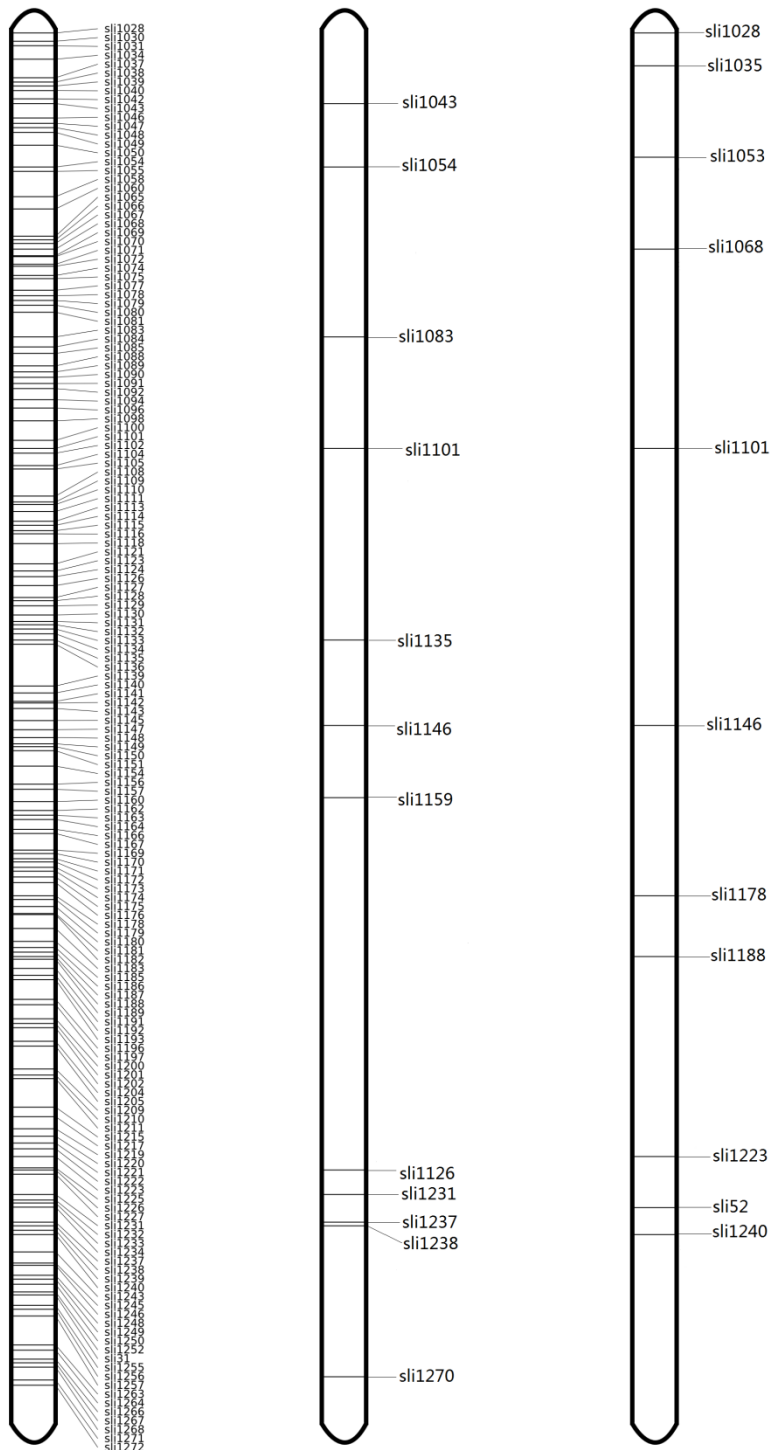

chr08



*Solanum pimpinellifolium*

*S. lycopersicum* var. *cerasiforme*

*S. lycopersicum*

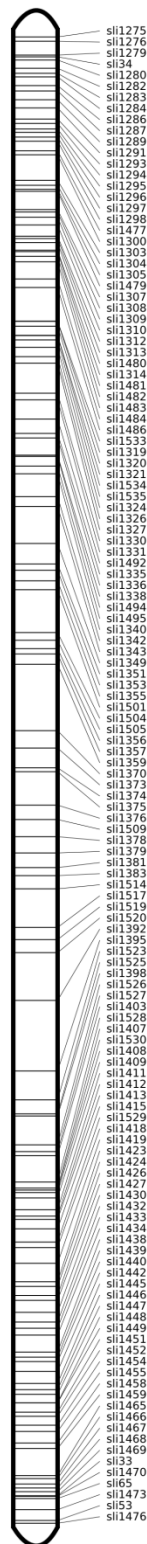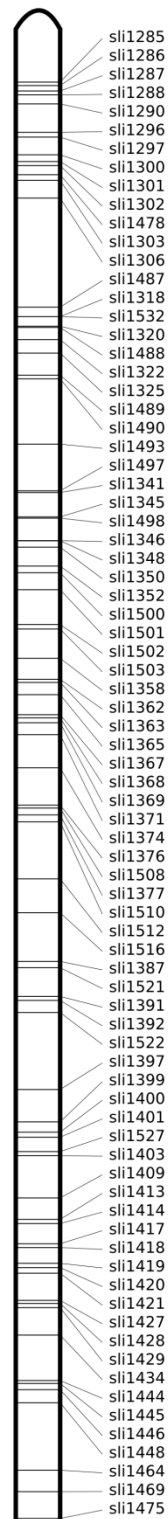

chr09

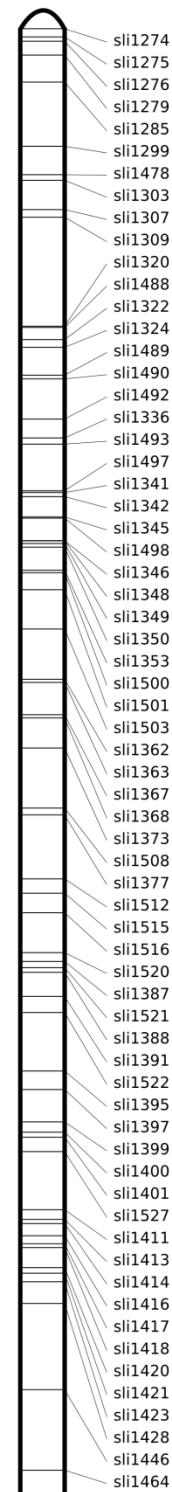

*Solanum pimpinellifolium* *S. lycopersicum* var. *cerasiforme* *S. lycopersicum*

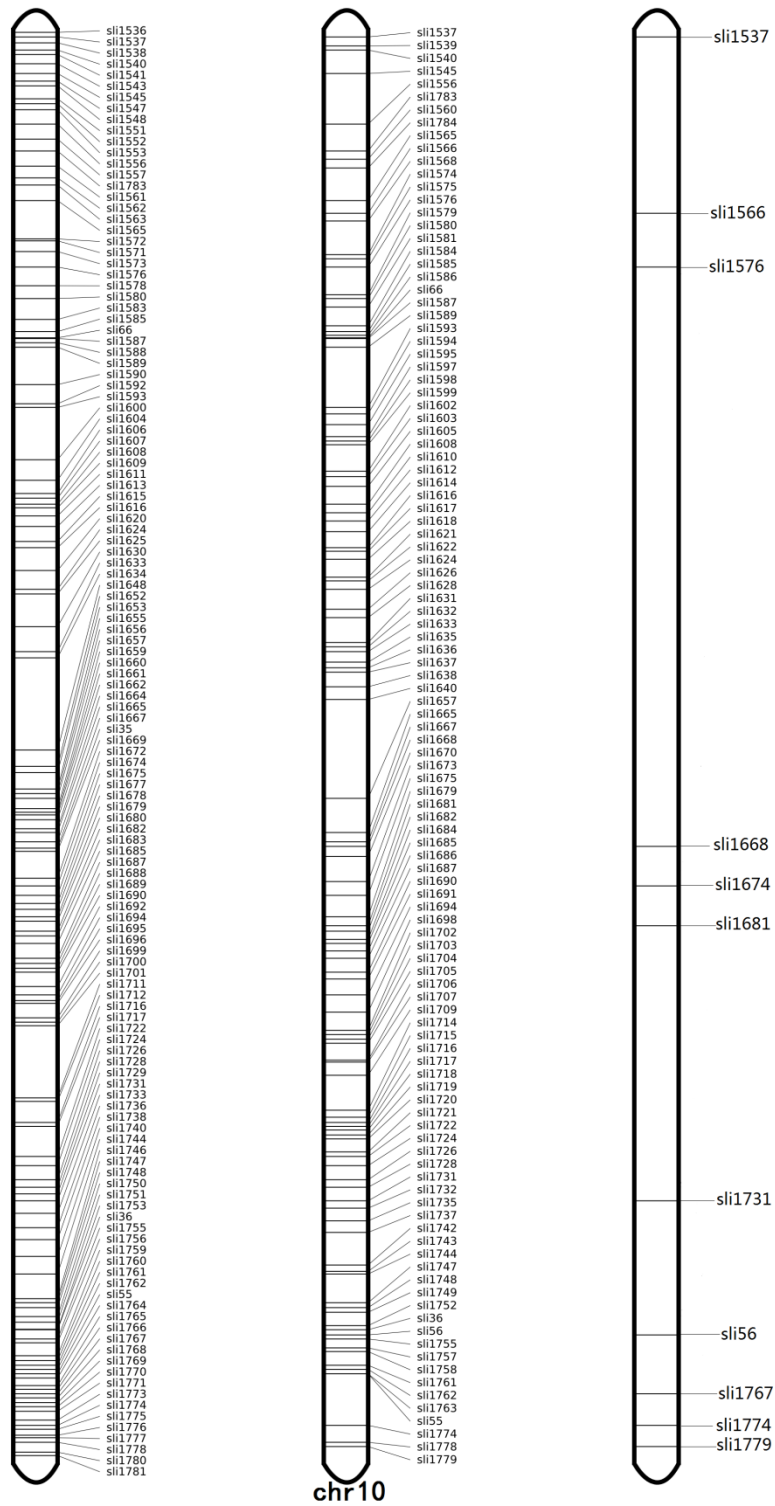

*Solanum pimpinellifolium*   *S. lycopersicum* var. *cerasiforme*   *S. lycopersicum*

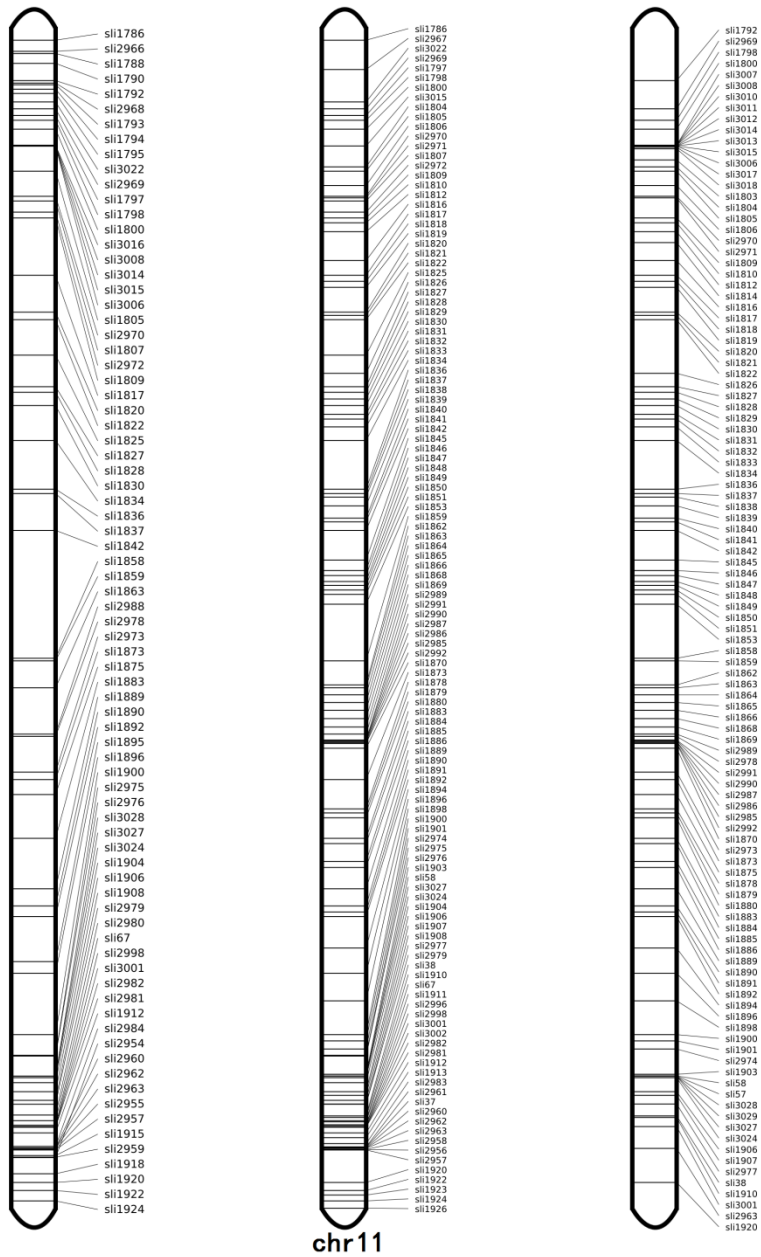

*Solanum pimpinellifolium*

*S. lycopersicum* var. *cerasiforme*

*S. lycopersicum*

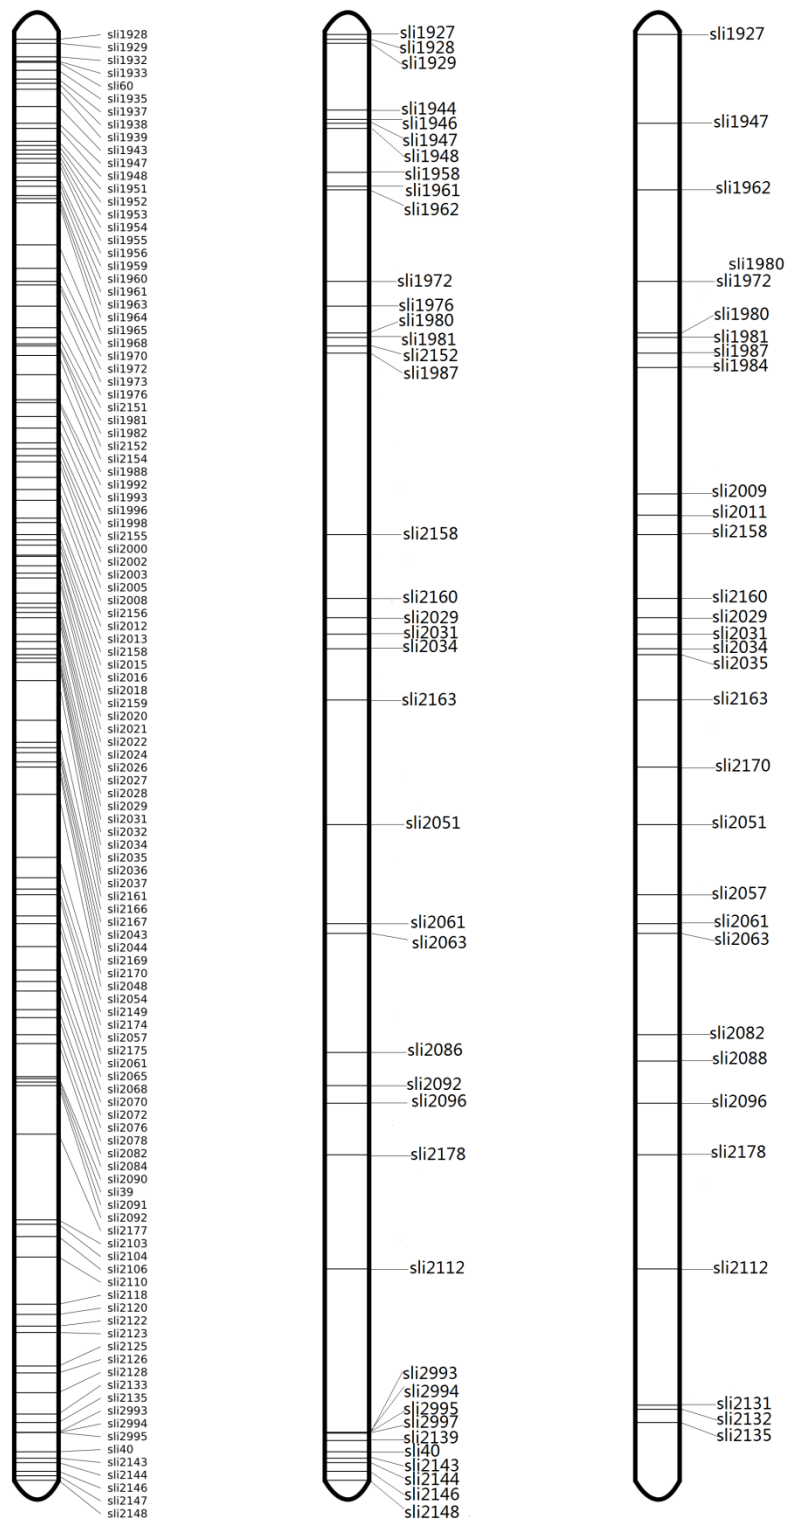

chr12
